# Supplementary material
Source: PubMed Central journal article supplement (PMC4966521)
Supplement: kmab-08-01-1112477-s001.pdf [file kmab-08-01-1112477-s001.pdf]

# Rational design of therapeutic mAbs against aggregation through protein engineering and incorporation of glycosylation motifs applied to bevacizumab

Fabienne Courtois, Neeraj J Agrawal, Timothy M Lauer, Bernhardt L Trout

Chemical Engineering, Massachusetts Institute of Technology, Cambridge, Massachusetts 02139

## Supplementary material

$$SAP_{Atom} = \frac{1}{n_{Simulation\ Frames}} \sum_{Simulation\ Average} \left[ \sum_{Residues\ Within\ R} \left( \frac{SAA\ of\ side\ chain\ atoms\ within\ radius\ R}{SAA\ of\ side\ chain\ atoms\ of\ fully\ exposed\ residue} \times Residue\ Hydrophobicity \right) \right]$$

$$SAP_{residue,j} = \frac{1}{n_{atoms}} \sum_{all\ atoms\ in\ residue\ j} SAP_{atom,i}$$

$$\phi_{eff,residue\ j} = \frac{SAA\ of\ side\ chain\ atoms}{SAA\ of\ side\ chain\ atoms\ of\ fully\ exposed\ residue} \times Residue\ Hydrophobicity$$

### S1. SAP calculation

|         |         |                              |                                                                                                  |    |
|---------|---------|------------------------------|--------------------------------------------------------------------------------------------------|----|
|         |         |                              | <-----FWR1-----><CDR1><-----FWR2-----><2><-----FWR3----->                                        |    |
|         | Query_1 | 1                            | DIQMTQSPSSLSASVGRVTITCSASQDISNYLNWYQQKPKAPKVLIIYFTSSLHSGVPSRFRFGSGSGTDFTLTISSLQPEDFATYYCQQ-YSTVP | 95 |
| V 87.4% | (83/95) | <a href="#">IGKV1D-33*01</a> | .....Q.....L...DA.N.ET.....F.....I.....-DNL.                                                     | 95 |
| V 87.4% | (83/95) | <a href="#">IGKV1-33*01</a>  | .....Q.....L...DA.N.ET.....F.....I.....-DNL.                                                     | 95 |
| V 90.6% | (87/96) | <a href="#">IGKV1-39*01</a>  | .....R...S.S.....L...AA...Q.....S...P.                                                           | 96 |
|         |         |                              | ★                                                                                                |    |
|         |         |                              | <-----FWR1-----><--CDR1><-----FWR2-----><--CDR2><-----FWR3----->                                 |    |
|         | Query_1 | 1                            | EVQLVESGGGLVQPGGSLRLSCAASGYTFTNYGMNWRQAPGKLEWVGWINTYTGEPTYAADFKRRFTFSLDTSKSTAYLQMNSLRAEDTAVYYCAK | 98 |
| V 72.4% | (71/98) | <a href="#">IGHV7-4-1*02</a> | Q...Q..SE.KK..A.VKV..K.....S.A.....Q...M.....N..N...QG.TG..V.....V.....IS..K.....R               | 98 |
| V 72.4% | (71/98) | <a href="#">IGHV7-4-1*01</a> | Q...Q..SE.KK..A.VKV..K.....S.A.....Q...M.....N..N...QG.TG..V.....V.....IC..K.....R               | 98 |
| V 71.4% | (70/98) | <a href="#">IGHV7-4-1*04</a> | Q...Q..SE.KK..A.VKV..K.....S.A.....Q...M.....N..N...QG.TG..V.....V.M...IS..K.....R               | 98 |
|         |         |                              | ★                                                                                                |    |

S2. Alignment of bevacizumab with germline sequences. High SAP residues present in the variable regions are indicated with a star, i.e., F50 in the light chain and V5 in the heavy chain.

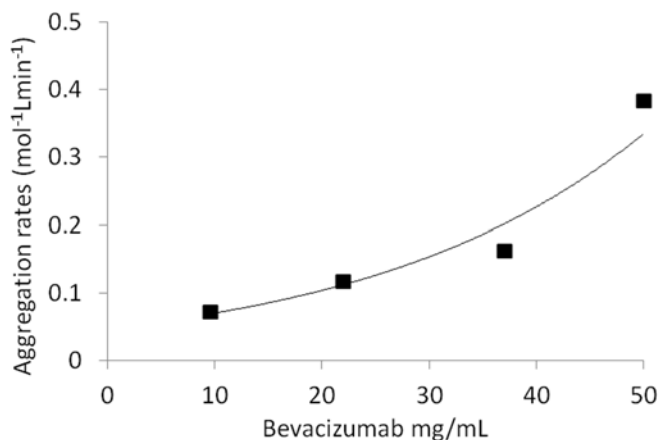

**S3. Aggregation rates of bevacizumab** in histidine buffer (pH 6.0) as a function of mAb concentrations.

Aggregation rates were measured by SEC-HPLC by following the amount of monomer loss over a 48-h incubation period at 52°C and fitted to a second order equation.

(A)

|       | LC-WT  | F50D   | V110K  | L154K  | L154D  | L201K  | HC-WT  | V5K    | L180K  |
|-------|--------|--------|--------|--------|--------|--------|--------|--------|--------|
| Score | -4.561 | -4.653 | -4.811 | -4.760 | -4.528 | -4.760 | -2.409 | -2.658 | -2.607 |

(B)

| Residues | V5   | V5K   | L180  | L180K | F50   | F50D  | V110  | V110K | L154 | L154K | L154D | L201  | L201K |
|----------|------|-------|-------|-------|-------|-------|-------|-------|------|-------|-------|-------|-------|
| Score    | 1.11 | 1.045 | 1.114 | 1.069 | 1.084 | 1.052 | 1.041 | 0.976 | 0.98 | 0.934 | 0.925 | 1.047 | 1.002 |

**S4. Immunogenicity predictions.** The risk of immunogenicity of bevacizumab WT and all the variants was predicted using the free online tool from IEDB (<http://tools.immuneepitope.org/main/>). (A) T Cell Epitopes - Immunogenicity Prediction. The tool was applied to the light chain of bevacizumab WT (LC-WT) and variants, and to part of the heavy chain, residues 1 to 222 (HC-WT). The higher score indicates a greater probability of eliciting an immune response. (B) Kolaskar and Tongaonkar antigenicity scale (parameters: center position: 4, window size: 7, threshold: 1) was used to predict linear B cell epitopes. The calculated scores are listed for each high SAP residue of bevacizumab WT and for their corresponding variants. The larger the score is the higher the probability that the residue is part of an epitope. Both T-cell and B-cell epitopes predictions show that the single point mutations did not increase the potential immunogenicity of the mAbs.
